# Supplementary material for: Factors acting on Mos1 transposition efficiency
Source: PubMed Central journal article supplement (PMC2642840; doi:10.1186/1471-2199-9-106), 2008-11-26
Supplement: 1471-2199-9-106-S1.pdf [file 1471-2199-9-106-S1.pdf]

## Sequences of DNA stuffer used in the study

### Minute Mos1 transposon sequence (3' ITR are in gray box)

TA-TCAGGTGTACAAGTATGAAATGTCGTTTGATATCAAGCTTGAATTCGCTGCAATAA  
ACAAGTTAACAACAACAATTGGATCCACTAGTTCTAGAAAACGACATTTTCATACTTGTAC  
ACCTGA-TA

### Tetracycline 1191 bp (61.4% GC / 37 TA)

ATGAAATCTTAACAATGCGCTCATCGTCATCCTCGGCACCGTCACCCTGGATGCTGTAGGC  
ATAGGCTTGGTTATGCCGGTACTGCCGGGCCCTCTTGCGGGATATCGTCCATTCCGACAGC  
ATCGCCAGTCACTATGGCGTGCTGCTAGCGCTATATGCGTTGATGCAATTTCTATGCGCA  
CCCGTTCTCGGAGCACTGTCCGACCGCTTTGGCCGCCGCCAGTCCTGCTCGCTTCGC  
CTTGGAGCCACTATCGACTACGCGATCATGGCGACCACACCCGTCCTGTGGATCCTCTAC  
GCCGGACGCATCGTGGCCGGCATCACCGGCGCCACAGGTGCGGTTGCTGGCGCCATATATC  
GCCGACATCACCGATGGGAAGATCGGGCTCGCCACTTCGGGCTCATGAGCGCTTGTTTC  
GGCGTGGGTATGGTGGCAGGCCCGTGGCCGGGGACTGTTGGGCGCCATCTCCTTG  
GCACCATTCCTTGCGGCGGGCGGTGCTCAACGGCTCAACCTACTACTGGGCTGCTTCC  
ATGCAGGAGTCGCA TAAGGGAGAGCGTCGACCGATGCCCTTGAGAGCCTTCAACCCAGTC  
AGCTCCTTCCGGTGGGCGCGGGGCATGACTATCGTTCGCGCACTTATGACTGTCTTCTTT  
ATCATGCAACTCGTAGGACAGGTGCCGGCAGCGCTCTGGGTCAATTTTCGGCGAGGACCGC  
TTTCGCTGGAGCGCGACGATGATCGGCCTGTGCTTTCGGTATTCGGAATCTTGCACGCC  
CTCGCTCAAGCCTTCGTCACTGGTCCCGCCACCAACGTTTCGGCGAGAAGCAGGCCAT  
ATCGCCGGCATGGCGGCCGACGCGCTGGGCACGTCTTGTGCGGTTTCGCGACGCGAGGC  
TGGATGGCCTTCCCCATTA TGATTCTTCTCGCTTCCGGCGGCATCGGGATGCCCGCGTTG  
CAGGCCATGCTGTCCAGGCAGGTAGATGACGACCATCAGGGACAGCTTCAAGGATCGCTC  
GCGGCTCTTACCAGCCTAACTTCGATCACTGGACCGCTGATCGTCACGGCGATTATGCC  
GCCTCGGCGAGCACATGGAACGGGTTGGCATGGATTGTAGGGCGCCGCCATATACCTTGT  
TGCTCCCCGCGTTGCGTTCGCGGTGCATGGAGCCGGGCCACCTCGACCTGA

### Tetracycline [TA-rich] 1191 bp (87 TA)

ATGAAATCTTAACAATGCGCTAATAGTTCATCCTAGGCACCGTAACCCTAGATGCTGTAGGC  
ATAGGCTTAGTTATGCCGGTACTGCCGGGCCATTAACGGGATATCGTCCATTCCGACAGC  
ATCGCCAGTCACTATGGCGTGCTGCTAGCGCTATATGCGTTTATGCAATTTCTATGCGCA  
CCCGTACTCGGAGCACTGTCCGACCGCTTTGGCCGCCGCCAGTCCTGCTCGCTTCGC  
CTAGGAGCCACTATCGACTACGCGATAATGGCGACCACACCCGTAATAATGGATACTATAC  
GCCGGACGCA TAGTGGCCGGCATAACCGGCGCCACAGGTGCGGTAGCTGGCGCCATATATC  
GCCGACATTAACCGATGGGAAGATCGGGCTCGCCACTTCGGGC TAATGAGCGCTTGTTTC  
GGCGTGGGTATGGTGGCAGGCCCGTAGCCGGGGACTATTAGGCGCCAATCCTTACAT  
GCACCATTCCTAGCGGCGGGCGGTGCTAAACGGCTCAACCTACTACTGGGCTGCTTCC  
ATGCAGGAGTCGCA TAAGGGAGAGCGTCGACCGATGCCCTTAAGAGCCTTCAACCCAGTA  
AGCTCCTTCCGGTGGGCGCGGGGCATGACTATCGTAGCCGCACTTATGACTGTATTCTTT  
ATAATGCAACTCGTAGGACAGGTACCGGCAGCGCTCTGGGTCAATTCGGCGAGGACCGC  
TTTCGCTGGAGCGCTACGATGATAAGCCTGTGCTAGCGGTATTCGGAATCTTACACGCC  
CTCGCTCAAGCCTTCGTA ACTTGGTCCCGCCACCAACGTTTCGGCGAGAAGCAGGCCAT  
ATCGCCGGCATGGCGGCCGACGCGCTGGGCACGTCTTGTGCGGTTTCGCGACGCGAGGC  
TGGATGGCCTTCCCCATTA TGATACTTCTCGCTTCCGGCGGCATCGGGATGCCCGCGT  
CAGGCCATGC TATCCAGGCAGGTAGATGACGACCATCAGGGACAGCTACAAGGATCGCTC  
GCGGCTCTTACCAGCCTAACTTCGATAACTGGACCGCTGATAGTTCACGGCGATATATGCC  
GCCTCGGCGAGCACATGGAACGGGTTGGCATGGATTGTAGGGCGCCGCCATATACCTAGTC  
TGCTTACCCGCGTTACGTTCGCGGTGCATGGAGCCGGGCCACCTCGACCTGA

### Tetracycline [TA-poor] 1191 bp (14 TA)

ATGAAATCAAACAATGCGCTCATCGTCATCCTCGGCACCGTCACCCTGGATGCTGTTGGC  
ATTGGCTTGGTTCATGCCGGTCTGCGGGCCTCTTGCGGGACATCGTCCATTCCGACAGC

ATCGCCAGTCAC**T**ATGGCGTGCTGCTTGGCGCTT**T**ATGCGTTGATGCAATTTCTTTGGCGCA  
CCCGTTCTCGGAGCACTGTCCGACCGCTTTGGCCGCCGCCAGTCCTGCTCGCTTCGCTT  
CTTGGAGCCACAATCGAC**T**ACGCGATCATGGCGACCACACCCGTCCTGTGGATCCTC**T**AC  
GCCGGACGCATCGTGGCCGGCATCACCGGCGCCACAGGTGCGGTTGCTGGCGCC**T**ACATC  
GCCGACATCACCGATGGGGAAGATCGGGCTCGCCACTTCGGGCTCATGAGCGCTTGTTC  
GGCGTGGGAATGGTGGCAGGCCCGTGGCCGGGGACTGTTGGGCGCCATCTCCTTGCAT  
GCACCATTCTTGGCGCGGCGGTGCTCAACGGCCTCAACCTTCTTCTGGGCTGCTTCCT**T**  
**A**TGCAGGAGTCGCACAAGGGAGAGCGTCGACCGATGCCCTTGAGAGCCTTCAACCCAGTC  
AGCTCCTTCCGGTGGGCGCGGGGCATGACAATCGTCGCCGCAC**T**AATGACTGTCTTCTT**T**  
**A**TCATGCAACTCGTTGGACAGGTGCCGGCAGCGCTCTGGGTCATTTTTCGGCGAGGACCGC  
TTTCGCTGGAGCGCGACGATGATCGGCCTGTGCTTGGGTTTTCGGAATCTTGCACGCC  
CTCGCTCAAGCCTTCGTCACTGGTCCCGCCACCAACGTTTTCGGCGAGAAGCAGGCCAT**T**  
**A**TCGCCGGCATGGCGGCCGACGCGCTGGGC**T**ACGTCTTGCTGGCGTTCGCGACGCGAGGC  
TGGATGGCCTTCCCCAT**T**ATGATTCTTCTCGCTTCCGGCGGCATCGGGATGCCCGCGTTG  
CAGGCCATGCTGTCCAGGCAGGTTGATGACGACCATCAGGGACAGCTTCAAGGATCGCTC  
GCGGCTCTCACCAGCCT**T**ACTTCGATCACTGGACCCTGATCGTCACGGCGATT**T**ATGCC  
GCCTCGGCGAGCACATGGAACGGGTTGGCATGGATTGTTGGCGCCGCCCTT**T**ACCTTGT  
TGCTCCCCGCGTTGCGTTCGCGGTGCATGGAGCCGGGCCACCTCGACCTGA

**Kanamycin** 1185 bp

ATGAGCCATATTTCAACGGGAAACGTCCTTGCTCTAGGCCGCGATTAAATTTCCAACATGGAT  
GCTGATTTATATGGGTATAAATGGGCTCGCGATAATGTCGGGCAATCAGGTGCGACAATC  
TATCGATTGTATGGGAAGCCCGATGCGCCAGAGTTGTTTCTGAAACATGGCAAAGGTAGC  
GTTGCCAATGATGTTACAGATGAGATGGTCAGACTAAACTGGCTGACGGAATTTATGCCT  
CTTCGACCATCAAGCATTTTATCCGTACTCCTGATGATGCATGGTTACTCACCCTGCG  
ATCCCCGGGAAAACAGCATTCCAGGTATTAGAAGAATATCCTGATTCAGGTGAAAATATT  
GTTGATGCGCTGGCAGTGTTCCTGCGCCGGTTGCATTTCGATTCTGTTTGTAATTGTCCT  
TTTAACAGCGATCGCGTATTTCTGCTCAGGCGCAATCACGAATGAATAACGGTTTG  
GTTGATGCGAGTGATTTTGATGACGAGCGTAATGGCTGGCCTGTTGAACAAGTCTGGAAA  
GAAATGCATAAACTTTTGGCATTCTCACCGGATTCAGTCGTCACCTCATGGTGATTTCTCA  
CTTGATAACCTTATTTTTGACGAGGGGAAATTAATAGGTTGTATTGATGTTGGACGAGTC  
GGAATCGCAGACCGATAACCAGGATCTTGCCATCCTATGGAAGTGCCTCGGTGAGTTTTCT  
CCTTCATTACAGAAACGGCTTTTTTCAAAAATATGGTATTGATAATCCTGATATGAATAAA  
TTGCAGTTTCATTTGATGCTCGATGAGTTTTTCTAAGAATTAATTCATGAGCGGATACAT  
ATTTGAATGTATTTAGAAAAATAAACAAATAGGGGTTCCGCGCACATTTCCCCGAAAAGT  
GCCACCTAAATTGTAAGCGTTAATATTTTTGTTAAAATTCGCGTTAAATTTTTGTTAAATC  
AGCTCATTTTTTAACCAATAGGCCGAAATCGGCAAAATCCCTTATAAATCAAAGAATAG  
ACCGAGATAGGGTTGAGTGTGTTCCAGTTTGGAAACAAGAGTCCACTATTAAGAACGTG  
GACTCCAACGTCAAAGGGCGAAAAACCGTCTATCAGGGCGATGGCCACTACGTGAACCAT  
CACCTAATCAAGTTTTTTTTGGGGTTCGAGGTGCCGTAAAGCACTAA

**Bsr gene** 423 bp

ATGAAGACCTTCAACATCTCCCAGCAGGATCTAGAATTAGTAGAAGTAGCGACAGAGAAG  
ATTACAATGCTTTATGAGGATAATAAACATCATGTGGGAGCGGCAATTCGTACGAAAACA  
GGAGAAATCATTTTCGGCAGTACATATTGAAGCGTATATAGGACGAGTAACTGTTTGTGCA  
GAAGCCATTGCGATTGGTAGTGCAGTTTCGAATGGACAAAAGGATTTTGACACGATTGTA  
GCTGTTAGACACCCTTATTCTGACGAAGTAGATAGAAGTATTCGAGTGGTAAGTCCTTGT  
GGTATGTGTAGGGAGTTGATTTTCAGACTATGCACCAGATTGTTTTGTGTTAATAGAAATG  
AATGGCAAGTTAGTCAAACTACGATTGAAGAACTCATTCCTCAAAATATACCCGAAAT  
TAA

**Sh-ble gene** 375 bp

ATGGCCAAGTTGACCAGTGCCGTTCCGGTGCTCACCGCGCGGACGTCGCCGGAGCGGTC  
GAGTTCTGGACCGACCGGCTCGGGTTCTCCCGGGACTTCGTGGAGGACGACTTCGCCGGT  
GTGGTCCGGGACGACGTGACCCTGTTTCATCAGCGCGGTCAGGACCAGGTGGTGCCGGAC  
AACACCCTGGCCTGGGTGTGGGTGCGCGGCCTGGACGAGCTGTACGCCGAGTGGTCGGAG  
GTCGTGTCCACGAACTTCCGGGACGCCTCCGGGCCGGCCATGACCGAGATCGGCGAGCAG  
CCGTGGGGGCGGGAGTTCGCCCTGCGCGACCCGGCCGGCAACTGCGTGCACCTTCGTGGCC  
GAGGAGCAGGACTGA

**Sh-ble gene [no TA]** 375 bp

ATGGCCAAGTTGACCAGTGCCGTTCCGGTGCTCACCGCGCGGACGTCGCCGGAGCGGTC  
GAGTTCTGGACCGACCGGCTCGGGTTCTCCCGGGACTTCGTGGAGGACGACTTCGCCGGT  
GTGGTCCGGGACGACGTGACCCTGTTTCATCAGCGCGGTCAGGACCAGGTGGTGCCGGAC  
AACACCCTGGCCTGGGTGTGGGTGCGCGGCCTGGACGAGCTGTTCCGCCGAGTGGTCGGAG  
GTCGTGTCCACGAACTTCCGGGACGCCTCCGGGCCGGCCATGACCGAGATCGGCGAGCAG  
CCGTGGGGGCGGGAGTTCGCCCTGCGCGACCCGGCCGGCAACTGCGTGCACCTTCGTGGCC  
GAGGAGCAGGACTGA

**Puro gene** 662 bp

ATGACCGAGTACAAGCCACGGTGCGCCTCGCCACCCGCGACGACGTCCCCCGGGCCGTA  
CGCACCTCGCCGCCGCGTTCGCCGACTACCCGCCACGCGCCACACCGTCGACCCGGAC  
CGCCACATCGAGCGGGTCACCGAGCTGCAAGAACTCTTCCTCACGCGGTTCGGGCTCGAC  
ATCGGCAAGGTGTGGGTGCGCGACGACGGCGCCGCGGTGGCGGTCTGGACCACGCCGGAG  
AGCGTCGAAGCGGGGCGGTGTTTCGCCGAGATCGGCCCGCGCATGGCCGAGTTGAGCGGT  
TCCCGGCTGGCCGCGCAGCAACAGATGGAAGGCCCTCCTGGCGCCGACCCGGCCCAAGGAG  
CCCGCGTGGTTCCTGGCCACCGTCGGCGTCTCGCCGACCACCAGGGCAAGGGTCTGGGC  
AGCGCCGTCGTGCTCCCCGGAGTGGAGGCGCCGAGCGCGCCGGGTGCCCGCCTTCCTG  
GAGACCTCCGCGCCCCGCAACCTCCCCTTCTACGAGCGGCTCGGCTTCACCGTCACCGCC  
GACGTCGAGGTGCCGAAGGACCGCGCACCTGGTGCATGACCCGCAAGCCGGTGCCGTA  
CGCCCGCCCCACGACCCGCGAGCGCCGACCGAAAGGAGCGCACGACCCCATGGCGCGCCT  
GA

**Fragment 1** 1256 bp (50.8% GC)

AAAAGATAGACAGTGTGATTA AAAAGACTGGACGACATTA AAAATTTTG TATCTGACACCCG  
AACGGGTGGTGTGTCGAACCAACTGATGGACGCGTAGCAACTCGGGTCTGTCGAA TAG  
TGA TAGACGAGGCACACTGTGTCTGTGAGTGGGGGCACGATTT TAGATCCGACT ACC TAA  
AACTCTCCGTCCTTCGAAC TATTTTCCGAGCGTGCCGACTACTGGCTTGACCCGCGACGG  
CGACCCCGCGCGTGCAGGGATATCGTTCGCTTGCTCGGCCTTCGCGAAAACCTTCGAGA  
CGTTCGTCGGTTCGTTTCGACAGACCCAATC TAAAAATCAGCGTT TACA AAAAGACTCCTC  
GTCACACACTGACCGTGGTGGACCTCGTGAAGGCGAGAGCCGGCTCTTCGATCG TATA TT  
GTCTTTCGAGACGCGAAACCGAGGCGGTGCGT AACGCTTTGAAATGCGCCGGATTTAGCG  
CGGAGGCG TATCACGCGCAATGACTCCCAAGAACCGCACTTCCGTGCAGAACAGATGGA  
TGGCGAACGAGACCCGAGTGATATGTTTCGACGATAGCGTTCGGGATGGGCATCGATAAC  
CCGACGTGCGGTTGGTGTATCATCACAGTATGCCCAAATCACTGGACGGTTAT TATCAAG  
AGATAGGAAGGGCCGGTTCGCGACGGA AAACTGTCGGAGTG TATCGCCTTTTACGGCGCCA  
ACGACGTCTCGAGATACAAA TATCTTTTCAGGATCAGCCAGAGCGACAATCCAGGAACA  
ATAAGATGCTGTCCACAATGTACACGTTCTGTACCAACACCTCCATTTGTGCGAGACGTC  
AAATATTGCGGTACTTTCGACGAGACGGTGGGCGACAGGGTCTTATGCGATTCTGTAAATT  
CTTGCGACAACCTGTAAATTTTATTTTGGTTTCTTACGCGCGCGCGTTAGAAATCACATGT  
ATGAA TATTTCTGGCTGTCCGCCATACGCTCTTGTCGTTGACATTGACGACTATCATGT  
CGGGGAGTTCTCTGACGATAAAAACACCA TAAGCGGTTTCTACGATACTGTACGGCACTT  
CTACGACTTCGCCCCGACGACGTCGCCACCAGAACCTTGTCGCTGTCGTAGAACATGAGCG  
AATTGGCCCC TAGATTTATTTCTTTTACCGAGAAGATCAAATTCGGCCACGAGCGGCCTTC  
TGAAATCGTTTCTCATCATGTATTGGACGTCGGTACGACGAGATCCGGGGAATTC

**Fragment 6** 1100 bp (43.3% GC)

TGTCACCGAATCGTATATTGGTTATAGACATGGCGCCTTCCGTGATAACTGACACACACA  
CACACACACACAATCTATTGTCAACCATCAATTCCTTTTGATCGACACATCGGGGTCA  
GTTGGTTTTTTTGCTTTTTTAGTGTGATAATTCGATTTTTTACTACGATACAGTGGGTCG  
TGAAAAGGGACTTTTTGATTAATAACGAGCACTCGCACACCCCATCGAACGATTTTC  
ATCGGACGGAACGTGTTGTGACGGCGGTGAATATCTACTTGTGACACGTTTACAAAGTT  
AACTTTAAAGTGCAAACGATACGTAACGCATCGAAGATCCTGCTCCAAACGACCCTGCG  
CAACTACATCGAAAAGAACGTGAAACAGGTCGCCTGCTACTTTGTGCGTGGTGTCAACGA  
CGGTAACGACGGCCACAACA TACTCACAACCCCGGAAC TACTCATTGTCCCAGCTGTAT  
GCATTGTTTACGTTGTACAGGGTGC GCGCGATAACCGAAAGTGTTTCTCATACAATCGTGT  
TTGGGTGCTAAGATAGATCCAGTCATTGCGATCGAGCGTCGTGTCAATGTGACCAAGAA  
GAAGACGCGCATCCACGTCCGTGTGTCACGACATCTTCGTCAACACAGTTCGTGCTGTG  
ATACACGCATGCAGTCGAAAATCTAAGGGTGC GACAACAAC TACCGAAACTAAATGTTGG  
GATGTGGCGAGAGGGGTTCTCACATGACGGCACAGGGAAGAAATATCATAGTTTATTTG  
CGTATGGAAGGGTATGTGAGGTAGGGTGCACAAAGTGTGGGTGTTTGATGATTGAGAAA  
TTTTGAAAAATCTCATAAAATAGGGTACTAGAGGAGTGTACACACAAGGATAAGGATG  
GTACAAAAGGAAATGCAAATCAGGGATCCAAAATATGTACCAATTGTGGAAATGAATTGT  
ACAAAATGTTATTTCTGGGGGAGGAGAAACAATATAATAATGGAAGAGTATTAGATTTGG  
GTTGGGGTGGGGTGGTCTGTTTGTGAAA TAAAAGTCTGGGCTTTTACTGCTAAAATTTA  
TTGAAATGGATTCGAAAGAAAGGGAATTCA

**Fragment 46** 1056 bp (50% GC)

AAGGACAATCCCGGCTGTGCACAAGTCGACAACATGTACTACATACAACAGCTGGTCAAC  
CCTCTCAC TAAGGTTTCCGAAGCGGTGTGGCGCCGCAGTAACAGCGT TAACATTGCCATC  
GCGCCGTTTCATCTAT TACAATAAGGTTT TAGCTCAATTGTCAAC TAGGTTTAAGATTTG  
CAATAAACTACAATGGGTACAAAACAAAATTTGTTTTATTTTCATTTTCTCAAATACACG  
ATTCGATCCACCAGGTTTCTCCTCGGTATAATTCC TAGAAGTCCACATGCGATCCGCACATG  
ATGTAGGTGCGATCTCGTCGAACCGTTGCGCCGACAATCTATTTCATCTGTACGTGCATCA  
ATGTGATGAAGTCATCGAGACACTGTGCAAAATCAACGGGGCAGCTGCCGACGATGCGGT  
CCGTCAACGTGCCGACAATCGTGCACCTTGTGACGCTCAAGTCATCGACGTAGTGTCTAAC  
GGTAGCGGCCAGCAGTTCACGATCTCGTCCGAGTGTGGGCGTGTGATAACCGTGGTCCGT  
CTCAGCGCGTACACGAGCGGTGTGATACGACGATTGTGCTTCTGATCGTGCCGTTTCCAGG  
ATTTCTGAGTGAGTCTTGTGTATTTTCATGGTAGTTACGTAGATAATGCACCCTCGGTGGGA  
TCGATGACGC TAGTCAAACGCATGGTGGATGGGTAGAGACACGGCCACCGAATGGTGATC  
ACGCACACCCGCTATGGTTGCATTAATCCGTAAGTGCCGGGTACTCGTGCCAATCAACT  
CGGCACACACCACACCCGACAGATGTTTTCGAAGTCGCTACTGCGCAAGCCTTC TAGCGCA  
GCGTG TAAAA TAGTTATGGAATTGGAATGTAATGCGTTCACGGGCCGCTGTTGCTCGATC  
AAGTCGATCAGCTCGTCCACCAGTTGCAGTCGA TATCTTCTCGGGTCCGATGTCTGTAGC  
CAAGTCGATGAAATCGTGCGTGGTACGTGCGGAAATGCTTCCCCTCCAATCTATGGTG  
CCGTATTCGAAAACACACC TACACTTGCCGATACAC

**Fragment 108** 1123 bp (37.7% GC)

TGGAGCGTTACCGTTTATGCCAATCGCAATGTGCACAACA TACATGGGAAGAAAAAGTAT  
TCTTGAAGTTGTAGAACACGTGAAAGAT TATGGAGGAACAGTGGTGTACGGGGACACGGA  
CTGCCTTTTGTGCAACCACTCCTGTTTTAATTCGAAAAGACGACAGCGATGTTTTTTTTTAC  
AACTGTGGATGAGT TAAG TAAAAATGACTGGGAG TACA TAAATCCCAACAAAGACATCTC  
GTCCCCAAAGAAAAT TACGAAA TATGGAGTGACACAGGATTTACAAAAGATCGAAAATGT  
TGTAAGATGTAAAA TAGACGAGCCCTAAAACGTGTAAC TACACATGTGGGCTCTGTAAT  
TTGTTCCGACAACCACTCCT TACTCACCGAAAATTTGACAGGTGTAACACCAAATGATGT  
TGT TATAGGGGATAGATTGTGTGTAAGAGAACTTCCGT TACAACAAGA TACACCACAAGT  
TCCAA TATATATAA TAGACT TACCGCAGAGAGGATCCAAATG TATGAAATCCAGAAGT  
TTCT TACCTAACGTGTCTGCCAAAATGGCTTTTGTATGGGGAT TATTTTTTTCGGACGG  
TGGTGCCGGTATT TACAAAACAAAGCAAATCTAATTGTTTGTCTAATTTTCACATGGGC TAT

CAA**TA**AAGCTCTGTCACGT**TAT**GAAATGGGAGGATCATGTGTCATGTGAACATGATCCAA  
AAATCATCAGAAAAAAGAAT**TA**ACAGTCAAAA**TAG**ACGAATTGAAAAGAAAGAT**TA**AGG  
ATGAAAAGGACAGGGG**TAG**GAAGGAT**TA**AGT**TAAAAA****TAG**ACTTGGCGTCCT**TA**ACAAAAG  
AAAGGT**CTAACATA**ACAAAAAACT**TAG****TAAAAGTGT****TAT**GTGTGCT**TA**AAAGAAGT**TATA**  
GATTTT**TAAAAGAGCCTCGAGGAGTTCTTCCGACAATCA****TA**AAGGATCTTCTGGACGCCA  
GAAAAACACTCGTGC GGAAA**TAAAAA****TAT**GGCAAAA**TA**AACT**TA**AATCAGCAGGTGGTCT  
TTGAAGAACAAGAAATCGCAAAATCAATGATCCAAATTCTGGACCAAAGACAAAATTCGT  
ACAAAGTCAGTGC**TA**ACTCAATG**TAT**GGAGCAACCGGT**TAG**

**Fragment 116** 1141 bp (44.3% GC)

GCGGAGATTT**TATA**AGCGAGCTGTGACT**TAT**CGAG**TATA**TCTCGAGCWGAGGATCG**TA**AC  
TTCTTCATTT**CAGCTCG****TAC**CTTCC**TGCGAGCGTCTA**AGAAG**TAT**TCAACCAATCTGG**TA**  
GTGTCTCATGCGAGTTTT**CAGTATAC**GAACTCGTTGTTTT**TGCGCACAGTCTA**GAACCACC  
AGACATTTCTGACTT**TAG**CACTTTCAATCGGATGGCGGCCCGCTG**TA**AATCAACCGACGA  
CAGCTTGATTGATGG**TAT**CGGAGAACCGTTG**TA**AT**TAT**CATCGG**TAAA**ACCAT**TAC**ATTC  
CGAG**TA**ATCTTCAACGT**CGTCA**ACTGGCT**TAC**CGGTTG**TACT**TGT**CGGCTTGA**AG**TACT**T  
TG**TA**ATCGGCTGAACCCCGATGCATTTTCGCTTCTCGACTTTTGC**TAG**ATCTTCGAA**TAT**  
TGACTT**TAG**TTTTTCGCGCTCTTT**TAT**GTTTGGATCGTGCTCGCAACCAACGTGATCCTC  
CCATTC**TACA**ATTTCAAAGTTTTCGT**CGGTG****TAG**TCACTGTGTGCATCGT**CGT**CGATGAC  
CG**TACTGTAG**CAGAGAT**TATA**AGCCATCATCAACGT**CGGATATA**TCCGACGTTGATGATG  
GT**TATA**ATCTCTGC**TACAGTAC**GGTCATCGACGACGATGCACACAGTGACT**TAC**ACCGACG  
AAAACTTT**GAAATTG****TAGA**ATGGGAGGATCACGTTGGTTGCGAGCACGATCCAAACA**TAA**  
AAGAGCGCGAAAAAC**TAA**AGTCAA**TAT**TCGAAGAT**CTAG**CAAAAGTCGAGAAGCGAAAAT  
GCATCGGGGTT**CAGCCGATTACA**AAAG**TACT**TCAAGCCGACAAG**TACA**ACCGG**TA**AGCAGT  
TGACGACGTTGAAGAT**TACT**CGGAATG**TA**ATGTTT**TAC**CGATG**TA**AT**TACA**ACGGTTCT  
CCG**TA**CCATCAATCAAGCTGT**CGT**CGGTTGATT**TAC**AGCGGGCCGCCATCCGATTGAAA  
GTGC**TAA**AGTCAAGAATGTCTGGTGGTTC**TAG**ACTGTGCGCAAAACAACGAGTT**CGTATA**  
CTGAAA**ACTCGCAGAGGACTACT****TAC**AGATTGGTTGAA**TACT**TCT**TAG**ACGCTCGCAGG  
AAGG**TAC**GAGCTGAAATGAAGAACGT**TAG**CGATCCTC**TAG**CTCGAGA**TATA**CTCGA**TA**AG  
T

**Fragment 193** 1127 bp (56.5% GC)

ACATCGAACACGCCAAGGCGATCGCCGATGAACAAGCGGCTCGTGCCCTTG**TAC**CGTTGCG  
ATG**TACAGTA**ACTGGT**CGAATA**CAAACGCACCGACTCGAGCCACCATGGACATCGAAGCG  
A**TAC**CGGACGTT**TAC**ACCGTCTCCG**TAC**CGGAGAGCATGGAACGTCCGATGGTGATTCTG  
TTCAACGACTTGACAATCTCCGAGGATTTGGTGGTGTTCGCGACGCACGGTGAGTTGATC  
AAG**TAC**GACACTCGA**TAC**CCGCCGTCGTCGGACGCAGCGCTGGCCGCCATGAGCAGTCGT  
CGCGCCAGGAAGGGTGGCGAACGAGACAAACGCATCTCGTTG**TAC**ATGGTGCAGCGCGGT  
ATCT**TACT**CGCCGGGCATGAAC**TAC**GACA**TAG**CGCACG**TAC**ACCAGACTCCCGGCGTGGGC  
**TAC**GTGATCACGGTGATCAG**TAATA**ACCGGCCACCCTCGACGTGCCTCGAAGTCT**TAG**TC  
ACCGCACTCGGCATGGGCGGTGACGACGATCAGGTGGTGGT**GAGCGATGTCGGCGGCGGT**  
GT**TACATA****TAC**ACCGCGT**CGTTCGTCC****TAA**ACGACATCACGTT**CGT**CACAG**TAC**CTGCAACA  
T**TAC**ACGTTGCTCAAGTG**TAC**CGACAAGGCGACGTG**TATA**TT**CGT**CGACGAAACGCATCT  
GATGAAG**TAC**CGCGGCCCTTGGCGTCGA**TACA**CAATCGCCAGTCCGCGATT**CA****TATA**CGA  
G**TACAATA**ATTT**CACGGTGAAGTT****TAG**CGCGACCGTGGAGAGCACGCGCAGGGACGTGGC  
TCGAGTGT**CGCC****TATTGCCGTATCCG****TATCTAC**GATGCGCCCAACACGCAGATCATG**TA**  
CGGCATGGCGAACGACATA**TAC**CGCACACATGATCGAG**TACA**AGAG**TAG**GGAGCGTT**CGAT**  
CCCGTCTCTG**TAC**GCCGAGAATC**TACA**CAACGATCAGCTGTTGCGGATCAACGTGCGCAT  
AATGCGT**GACTCGAA**ACCGT**TAA**ACGCGAACCCGGCT**TAC**CTGGCTCGGCAACACCGACAG  
GTCCG**TAG**AAA**ACTGCA**AGCGCAAAAGACCGGCACCAACGCAGACG**TAC**GCTCCCTGATC  
GGTGTCAACAAC**TAC**GCCAGACAATGTGCACGCC**TAC**CT**TAC**AGCCGT



TCATCTTGAC **TATA**TCGA **TA**TGCGTGCTGTCGTGTCGAC **TAC**GAAGATTCGACGATGCCA  
TCAAGGACACGGTTGAATGATGCGAG **TAC**GTCTTCGCGTGGCAAGTTCCGTTCAACACG  
AAAAC TGAAC **TAT**GGTTGTCGACG **TAT**CGTTTCGTG **TAG**CATTCGACTCTTCGAAA **TAC**  
TCGACGTCCAATGATTTCTCCGCCTCGCGTCCTCGTTCTGAGCTCGGCGGTGACAGGTG  
TCCGGTTTCGTGTCAATG **TAC**ACGACGTGGTTCGATTCTCGGAATGTCATTCTCCAACTG  
CGAAACACATCCGTG **TAC**ACGTCGAATTGTTTGTGCGGTGATCGAGCCTCGGTCTCGCATC  
ATTCTGGTGAAGACGT **TAC**GCCGACCACGGCGAGCGTTCCATGA **TA**ACGACTCGAGCT  
CCGGTTCGACAGACATGTCTCG **TAC**GAGTCCAACCACTTTTGA **TATTTA**CTCGTCAGCACT  
TGCAGCTCGAAGGGGAAAGCG **TATC**

**Tet-1 (56.3% GC)**

ATGAAATC **TA**ACAATGCGCTCATCGTCATCCTCGGCACCGTCACCCCTGGATGCTG **TAG**GC  
**A**TAGGCTTGGT **TAT**GCCGG **TACT**GCCGGGCTCTTGCGGG **TAT**CGTCCATTCCGACAGC  
ATCGCCAGTCACT **TA**TGGCGTGCTG **TAG**CGC **TATA**TGCGTTGATGCAATTT **TAT**GCGCA  
CCCGTTCTCGGAGCACTGTCCGACCGCTTTGGCCGCCGCCAGTCCTGCTCGCTTCGC **TA**  
CTTGAGCCAC **TAT**CGAC **TAC**GCGATCATGGCGACCACACCCGTCCTGTGGATCCTC **TAC**  
GCCGGACGCATCGTGGCCGGCATCACCGGCGCCACAGGTGCGGTTGCTGGCGCC **TATA**TC  
GCCGACATCACCGATGGGGAAGATCGGGCTCGCCACTTCGGGCTCATGAGCGCTTGTTTC  
GGCGTGGG **TAT**GGTGGCAGGCCCGTGGCCGGGGACTGTTGGGCGCCATCTCCTTGCA  
GCACCATTCTTGCGGCGGGCGGTGCTCAACGGCTCAACC **TACTA**CTGGGCTGCTTC **TA**  
ATGCAGGAGTCGCA **TA**AGGGAGAGCGTCGACCGATGCCCTTGAGAGCCTTCAACCCAGTC  
AGCTCCTTCGGTGGGCGGGGCATGAC **TAT**CGTCGCCGCACT **TAT**GACTGTCTTCTTT  
**A**TCATGCAACTCG **TAG**GACAGGTGCCGGCAGCGCTCTGGGTCAATTTTCGGCGAGGACCGC  
TTTCGCTGGAGCGCGACGATGATCGGCCTGTGCTTGCGG **TAT**TCGGAATCTTGCACGCC  
CTCGCTCAAGCCTTCGTCACTGGTCCCGCCACCAACGTTTCGGCGAGAAGCAGGCCAT **T**  
**A**TCGCCGGCATGGCGGCCGACGCGCTGGGC **TAC**GTCTTGCTGGCGTTCGCGACGCGAGGC  
TGGATGGCTTCCCCAT **TAT**GATTCTTCTCGCTTCCGGCGGCATCGGGATGCCCGGTTG  
CAGGCCATGCTGTCCAGGCAGG **TAG**ATGACGACCATCAGGGACAGCTTCAAGGATCGCTC  
GCGGCTCT **TACC**AGCC **TAA**CTTCGATCACTGGACCGCTGATCGTCACGGCGATTT **TAT**GCC  
GCCTCGGCGAGCACATGGAACGGGTTGGCATGGATTG **TAG**GGCGCCGCC **TATA**CCTTGTC  
TGCCTCCCCGCGTTGCGTCCGGTGCATGGAGCCGGGCCACCTCGACCTGAATGGAAGCC  
GGCGCACCTCGC **TAA**

AAAAGA **TAG**ACAGTGTGAT **TAAA**AGACTGGACGACAT **TAAA**ATTTTG **TAT**CTGACACCCG  
AACGGGTGGTGTGTCGAACCAACTGATGGACGCGC **TAG**GCAACTCGGGTCTGTCGAA **TAG**  
TGA **TAG**ACGAGGCACACTGTGTCTGTGAGTGGGGGCACGATTT **TAG**ATCCGAC **TACC** **TAA**  
AACTCTCCGTCCTTCGAAC **TAT**TTTCCCGAGCGTGCCGA **TACT**GGCTTGACCCGCGACGG  
CGACCCCGCGCGTGCAGGGAT **TAT**CGTTTCGCTTGCTCGGCCTTCGCGAAAACCTTCGAGA  
CGTTCGTCGGTTCGTTTCGACAGACCCAATC **TAAAA**ATCAGCGTT **TAC**AAAAAGACTCCTC  
GTCACACACTGACCGTGGTGGACCTCGTGAAGGCGAGAGCCGGCTCTTCGATCG **TATA**TT  
GTCTTTCGAGACGCGAAACCGAGGCGGTGCG **TAC**CGCTTTGAAATGCGCCGGATTT **TAG**CG  
CGGAGCG **TAT**CACGCGCAATGACTCCCAAGAACCGCACTTCCGTGCAGAACAGATGGA  
TGGCGAACGAGACCCGAGTGAT **TAT**GTTCGACGA **TAG**CGTTCGGGATGGGCATCGATA **TA**AC  
CCGACGTGCGGTTGGTGA **TAC**ATCACAG **TAT**GCCCAAATCACTGGACGGT **TAT** **TAT**CAAG  
AGA **TAG**GAAAGGGCCGGTTCGCGACGGAAAACCTGTCGGAGTG **TAT**CGCCTTT **TAC**GGCGCCA  
ACGACGTCTCGAGA **TAC**AAA **TAT**CTTTTCAGGATCAGCCAGAGCGACAATCCAGGAACA  
**ATA**AGATGCTGTCCACAATG **TAC**ACGTTCTG **TAC**CAACACCTCCATTTGTGCGACAGCTC  
AAA **TAT**TTGCGG **TACT**TCGACGAGACGGTGGGCGACAGGGTCT **TAT**GCGATTCTG **TAA**ATT  
CTTGCGACAACTG **TAA**ATTT **TAT**TTTGGTTTCT **TAC**GCGCGCGCGT **TAG**AAATCACATGT  
**AT**GAA **TAT**TTCTGGCTGTCCGCCCA **TAC**GCTCTTGTCGTTGACATTGACGAC **TAT**CATGT  
CGGGGAGTTCTCTGACGA **TAAAA**ACCA **TA**AGCGGTTTC **TAC**GTA **TACT**G **TAC**GGCACTT  
C **TAC**GACTTCGCCCGACGACGTCGCCACCAGAACCTTGTCGCTGTG **TAG**AACATGAGCG  
AATTGGCCCC **TAG**ATTT **TAT**TTCTTT **TAC**CGAGAAGATCAAATTCGGCCACGAGCGGCCCTC  
TGAAATCGTTTCTCATCATG **TAT**TGGACGTCCGTCACGACGAGATCCGGGGAATTC

**Tet-6 (52.9% GC)**

ATGAAATCTAACAAATGCGCTCATCGTCATCCTCGGCACCGTCACCCTGGATGCTGTAGGC  
ATAGGCTTGGTTATGCCGGTACTGCCGGGCCTCTTGCGGGATATCGTCCATTCCGACAGC  
ATCGCCAGTCACTATGGCGTGCTGTAGCGCTATATGCGTTGATGCAATTTCTATGCGCA  
CCCGTTCTCGGAGCACTGTCCGACCGCTTTGGCCGCCGCCAGTCCTGCTCGCTTCGC  
CTTGGAGCCACTATCGACTACGCGATCATGGCGACCACACCCGTCCTGTGGATCCTCTAC  
GCCGGACGCATCGTGGCCGGCATCACCGGCGCCACAGGTGCGGTTGCTGGCGCCATATC  
GCCGACATCACCGATGGGGAAGATCGGGCTCGCCACTTCGGGCTCATGAGCGCTTGTTC  
GGCGTGGGTATGGTGGCAGGCCCGTGGCCGGGGACTGTTGGGCGCCATCTCCTTG  
GCACCATTCCTTGCGGCGGGCGGTGCTCAACGGCTCAACCTACTACTGGGCTGCTTCTA  
ATGCAGGAGTCGCA TAAGGGAGAGCGTCGACCGATGCCCTTGAGAGCCTTCAACCCAGTC  
AGCTCCTTCCGGTGGGCGCGGGGCATGACTATCGTCGCCGCACTTATGACTGTCTTCTTT  
ATCATGCAACTCGTAGGACAGGTGCCGGCAGCGCTCTGGGTCAATTTTCGGCGAGGACCGC  
TTTCGCTGGAGCGCGACGATGATCGGCCTGTGCTTGGGTATTCGGAATCTTGCACGCC  
CTCGCTCAAGCCTTCGTCACTGGTCCCGCCACCAACGTTTCGGCGAGAAGCAGGCCAT  
ATCGCCGGCATGGCGGCCGACGCGCTGGGCACGTCCTTGTGGCGTTCGCGACGCGAGGC  
TGGATGGCCTTCCCCATATGATTCTTCTCGCTTCCGGCGGCATCGGGATGCCCGGTTG  
CAGGCCATGCTGTCCAGGCAGGTAGATGACGACCATCAGGGACAGCTTCAAGGATCGCTC  
GCGGCTCTTACCAGCTAACTTCGATCACTGGACCGCTGATCGTCACGGCGATTTATGCC  
GCCTCGGCGAGCACATGGAACGGGTTGGCATGGATTGTAGGGCGCCGCCATATACTTGT  
TGCTCCCCCGGTTGCGTCCGGTGCATGGAGCCGGGCCACCTCGACCTGAATGGAAGCC  
GGCGCACCTCGCTAA  
TGTCACCGAATCGTATATTGGTTATAGACATGGCGCCTTCCGTGATAACTGACACACACA  
CACACACACACAATCTATTGTCAACCATCAATTCCTTTTGATCGACACATCGGGGTCA  
GTTGGTTTTTTTGCTTTTTTAGTGTGATAATTTGATTTTTTACTACGATACAGTGGGTCG  
TGAAAAGGGACTTTTGATTAATCAACGAGCACTCGCACACCCCATCGAACGATTTT  
ATCGGACGGAACGTGTTGTGACGGCGGTGAATATCTACTTGTGACACGTTTACAAAGTT  
AACTTTAAAGTGCAAACGATACGTAAACGCATCGAAGATCCTGCTCCAAACGACCCTGCG  
CAACTACATCGAAAAGAACGTGAAACAGGTGCGCTGCTACTTTGTGCTGGTGTCAACGA  
CGGTAAACGACGGCCACAACA TACTCACAACCCCGGAAC TACTCATTGTCCCAGCTGTAT  
GCATTGTTACGTTGTACAGGGTGCGCGCGATACCGAAAGTGTTTCTCATACAATCGTGT  
TTGGGTGCTAAGATAGATCCAGTCATTGCGATCGAGCGTCGTGTCAATGTGACCAAGAA  
GAAGACGCGCATCCCACGTCCGTGTGTCACGACATCTTCGTCAACACAGTTTCGTGCTGTG  
ATACACGCATGCAGTCGAAAATCTAAGGGGTGACACAAACTACCGAAACTAAATGTTGG  
GATGTGGCGAGAGGGGTTCTCACATGACGGCACAGGGAAGAAATATCATAGTTTATTTG  
CGTATGGAAGGGTATGTGAGGTAGGGTGACACAAAGTGTGGGTGTTTGATGATTGAGAAA  
TTTTGAAAAATCTCATAAAATAGGGTACTAGAAAGGAGGTACACACAAGGATAAGGATG  
GTACAAAAGGAAATGCAAATCAGGGATCCAAAATATGTACCAATTGTGGAAATGAATGT  
ACAAAATGTTATTTCTGGGGGAGGAGAACTATAATAATGGAAGAGTATTAGATTTGG  
GTTGGGGTGGGGTGGTCTGTTTGTGAAA TAAAAGTCTGGGCTTTTACTGCTAAAATTTA  
TTGAAATGGATTTCGAAAGAAAGGAATTCA

**Tet-46 (56.2% GC)**

ATGAAATCTAACAAATGCGCTCATCGTCATCCTCGGCACCGTCACCCTGGATGCTGTAGGC  
ATAGGCTTGGTTATGCCGGTACTGCCGGGCCTCTTGCGGGATATCGTCCATTCCGACAGC  
ATCGCCAGTCACTATGGCGTGCTGTAGCGCTATATGCGTTGATGCAATTTCTATGCGCA  
CCCGTTCTCGGAGCACTGTCCGACCGCTTTGGCCGCCGCCAGTCCTGCTCGCTTCGC  
CTTGGAGCCACTATCGACTACGCGATCATGGCGACCACACCCGTCCTGTGGATCCTCTAC  
GCCGGACGCATCGTGGCCGGCATCACCGGCGCCACAGGTGCGGTTGCTGGCGCCATATC  
GCCGACATCACCGATGGGGAAGATCGGGCTCGCCACTTCGGGCTCATGAGCGCTTGTTC  
GGCGTGGGTATGGTGGCAGGCCCGTGGCCGGGGACTGTTGGGCGCCATCTCCTTG  
GCACCATTCCTTGCGGCGGGCGGTGCTCAACGGCTCAACCTACTACTGGGCTGCTTCTA  
ATGCAGGAGTCGCA TAAGGGAGAGCGTCGACCGATGCCCTTGAGAGCCTTCAACCCAGTC  
AGCTCCTTCCGGTGGGCGCGGGGCATGACTATCGTCGCCGCACTTATGACTGTCTTCTTT

ATCATGCAACTCGTAGGACAGGTGCCGGCAGCGCTCTGGGTCAATTTTCGGCGAGGACCGC  
TTTCGCTGGAGCGCGACGATGATCGGCCTGTGCTTTCGGTATTTCGGAATCTTGCACGCC  
CTCGCTCAAGCCTTCGTCACTGGTCCC GCCACCAAACGTTTCGGCGAGAAGCAGGCCATT  
ATCGCCGGCATGGCGGCCGACGCGCTGGGCACGTCTTGCTGGCGTTCGCGACGCGAGGC  
TGGATGGCCTTCCCCATTATGATTCTTCTCGCTTCCGGCGGCATCGGGATGCCCGCGTTG  
CAGGCCATGCTGTCCAGGCAGGTAGATGACGACCATCAGGGACAGCTTCAAGGATCGCTC  
GCGGCTCTTACCAGCCTAACTTCGATCACTGGACCCTGATCGTCACGGCGATTATGCC  
GCCTCGGCGAGCACATGGAACGGGTTGGCATGGATTGTAGGGCGCCGCCATATACCTTGT  
TGCTCCCCGCGTTGCGTGCGGTGCATGGAGCCGGGCCACCTCGACCTGAATGGAAGCC  
GGCGGCACCTCGCTAA  
AAGGACAATCCC GGCTGTGCACAAGTCGACAACATGTACTACATAACAACAGCTGGTCAAC  
CCTCTCACTAAGTTTCCGAAGCGGTGTGGCGCCGAGTAACAGCGTTAACATTGCCATC  
GCGCCGTTTCATCTATTACAATAAGTTT TAGCTCAATTGTCAACTAGGTTTAAGATTTG  
CAATAAACACAATGGGTACAAAACAAAATTTGTTTTATTTTCATTTTCTCAAATACACG  
ATTCGATCCACCAGGTTTCTCGGTATATTTCCTAGAAGTCCACATGCGATCCGCACATG  
ATGTAGGTCGCATCTCGTCGAACCGTTGCGCCGACAATCTATTCATCTGTACGTGCATCA  
ATGTGATGAAGTCATCGAGACACTGTGCAAAATCAACGGGGCAGCTGCCGACGATGCGGT  
CCGTCAACGTGCCGACAATCGTGCACCTGTGACGCTCAAGTCATCGACGTAGTGTCTAAC  
GGTAGCGGCCAGCAGTTCACGATCTCGTCCGAGTGTGGGCGTGTGATACCGTGGTCCGT  
CTCAGCGGTACACGAGCGGTGTGATACGACGATTTGTCGTTCCCTGATCGTCCGTTCCAGG  
ATTCCTCGAGTGAGTCTTGTGTATTTTCATGGTAGTTACGTAGATATGCACCCTCGGTGGGA  
TCGATGACGCTAGTCAAACGCATGGTGGATGGGTAGAGACACGGCCACCGAATGGTGATC  
ACGCACACCGCCTATGGTTGCATTATTCCGTAAAGTGCCGGGTACTCGTGCCAATCAACT  
CGGCACACACCCACACCGACAGATGTTTTCGAAGTCGCTACTGCGCAAGCCTTC TAGCGCA  
GCGTGTAATAAGTTATGGAATTGGAATGTAATGCGTTCACGGGCCGCTGTTGCTCGATC  
AAGTCGATCAGCTCGTCCACCAGTTGCAGTCGATATCTTCTCGGGTCCGATGTCTGTAGC  
CAAGTCGATGAAATCGTGCCTGGTACGTGCGGAAATGCTTCCCCTCCAATCTATGGTG  
CCGTATTCGAAAACACACCTACACTTGCCGATACAC

**Tet-108 (50.1% GC)**

ATGAAATCTACAATGCGCTCATCGTCATCCTCGGCACCGTCACCCTGGATGCTGTAGGC  
ATAGGCTTGGTTATGCCGGTACTGCCGGGCTCTTTCGGGATATCGTCCATTCCGACAGC  
ATCGCCAGTCATATGGCGTGCTGTAGCGCTATATGCGTTGATGCAATTTCTATGCGCA  
CCCGTTCTCGGAGCACTGTCCGACCCTTTGGCCGCCGCCAGTCCCTGCTCGCTTCGC  
CTTTGGAGCCACTATCGACTACGCGATCATGGCGACCACACCCGTCCTGTGGATCCTC  
TACGCCGACGCATCGTGGCCGGCATCACCGCGCCACAGGTGCGGTTGCTGGCGCC  
TATATCGCCGACATCACCGATGGGGAAGATCGGGCTCGCCACTTCGGGCTCATGAGCGCTTGT  
TTGCGGTGGGTATGGTGGCAGGCCCGTGGCCGGGGACTGTTGGGCGCCATCTCCTTGCAT  
GCACCATTCTTGCGGCGGGCGGTGCTCAACGGCTCAACCTACTACTGGGCTGCTTCC  
TATGTCAGGAGTCGCAAGAGGAGAGCGTCGACCGATGCCCTTGAGAGCCTTCAACCCAGTC  
AGCTCCTTCCGGTGGGCGCGGGGCATGACTATCGTTCGCCGACTATGACTGTCTTCTTT  
ATCATGCAACTCGTAGGACAGGTGCCGGCAGCGCTCTGGGTCAATTTTCGGCGAGGACCGC  
TTTCGCTGGAGCGCGACGATGATCGGCCTGTGCTTTCGGTATTTCGGAATCTTGCACGCC  
CTCGCTCAAGCCTTCGTCACTGGTCCC GCCACCAAACGTTTCGGCGAGAAGCAGGCCATT  
ATCGCCGGCATGGCGGCCGACGCGCTGGGCACGTCTTGCTGGCGTTCGCGACGCGAGGC  
TGGATGGCCTTCCCCATTATGATTCTTCTCGCTTCCGGCGGCATCGGGATGCCCGCGTTG  
CAGGCCATGCTGTCCAGGCAGGTAGATGACGACCATCAGGGACAGCTTCAAGGATCGCTC  
GCGGCTCTTACCAGCCTAACTTCGATCACTGGACCCTGATCGTCACGGCGATTATGCC  
GCCTCGGCGAGCACATGGAACGGGTTGGCATGGATTGTAGGGCGCCGCCATATACCTTGT  
TGCTCCCCGCGTTGCGTGCGGTGCATGGAGCCGGGCCACCTCGACCTGAATGGAAGCC  
GGCGGCACCTCGCTAA  
TGGAGCGTTACCGTTTATGCCAATCGCAATGTGCACAACATACATGGGAAGAAAAAGTAT  
TCTTGAAGTTGTAGAACACGTGAAAGATTATGGAGGAACAGTGGTGTACGGGGACACGGA  
CTGCCTTTGTGCAACCACTCCTGTTTAAATTCGAAAAGACGACAGCGATGTTTTTTTAC

AACTGTGGATGAGT**TAAGT**AAAAATGACTGGGAG**TACATA**AAATCCCAACAAAGACATCTC  
GTCCCCAAAGAAAAT**TACGAAA**TATGGAGTGACACAGGATT**TACAAAGATCGAAAATGT**  
TG**TAAGATGT**AAAA**TAGACGAGCCCC**TAAACCGT**TAAC**TACACATGTGGGCTCTG**TAAT**  
TTGTTCCGACAACCACTCCT**TA**CTCACC**GAAAA**TTTGACAGGTG**TAAC**ACCAAATGATGT  
TGT**TATAGGGG**TAGATTGTGTG**TAAGAGA**ACTTCCGT**TACAACA**AGAT**TACACCACA**AGT  
TCCAA**TATATATA**AA**TAGACT**TACCGCAGAGAGGATCCAAATG**TATGAAAT**CCCAGAAGT  
TTCT**TACC**TAAACGTGTCTGCCAAAATGGCTTTTGT**TATGGGGAT**TATTTTTTGGCGACGG  
TGGTGCCGG**TATT**TACAAACAAAGCAAATC**TAATTGTTTGTCTAATTT**CACATGGGC**TAT**  
CA**TAAGCTCTGT**CACGT**TATGAAAT**GGGAGGATCATGTGT**TAATTT**CACATGGGC**TAT**  
AAATCATCGAAAAAAGAAT**TAACAGTCAAAA**TAGACGAATTGAAAAGAAAGAT**TAAGG**  
ATGAAAAGGACAGGGG**TAGGAAGGA**TAAGT**TA**AAAA**TAGACT**TGGCGTCT**TAACAAAAG**  
AAAGGTC**TAACATA**ACAAAAAAACT**TAGTAA**AAAGTGT**TATGTGTGCTAA**AAAGAAGT**TATA**  
GATTTT**TAA**AAAGAGCCTCGAGGAGTTCTTCCGACAATCA**TAAAGGATCTTCT**GGACGCCA  
GAAAAACACTCGTGC**GAAA**TA**AAAA**TATGGCAAAA**TAAACT**TAAATCAGCAGGTGGTCT  
TTGAAGAACAAGAAATCGCAAAATCAATGATCCAAAT**TCTGGACCAAAGACAAAATTCGT**  
ACAAAGTCAGTGC**TA**ACTCAATG**TATGGAGCAACCGGTGT**TAG

**Tet-116 (53.2% GC)**

ATGAAATCTACAATGCGCTCATCGTCATCCTCGGCACCGTCACCCTGGATGCTG**TAGGC**  
A**TAGGCTTGGT**TATGCCGG**TACT**GCCGGGCCTCTTGCGGGG**TATCGTCCAT**TCCGACAGC  
ATCGCCAGTCAC**TATGGCGT**GCTGC**TAGCGCTATAT**GCCTTGATGCAATTT**CTAT**GC  
CCCGTTCTCGGAGCACTGTCCGACCGCTTTGGCCGCCGCCAGTCTTGCTCGCTTCGC**TA**  
CTTGGAGCCAC**TATCGAC**TACGCGATCATGGCGACCACACCCGTCCTGTGGATCCT**CTAC**  
GCCGGACGCATCGTGGCCGGCATCACCGCGCCACAGGTGCGGTTGCTGGCGCC**TATATC**  
GCCGACATCACCGATGGGGAAGATCGGGCTCGCCACTTCGGGCTCATGAGCGCTTGT**TTT**  
GGCGTGGG**TATGGT**GGCAGGCCCGTGGCCGGGGACTGTTGGGCGCCATCTCCTTG**CAT**  
GCACCATTCC**TTGCGGCGGCGGTGCTCAACGGCCTCAACC**TACTACTGGGCTGCTTCC**TA**  
ATGCAGGAGTCGCA**TAAGGGAGAGCGT**CGACCGATGCCCTTGAGAGCCTTCAACCCAGTC  
AGCTCCTTCCGGTGGGCGCGGGGCATGAC**TATCGT**CGCCGCACT**TATGACTGTCTTCTTT**  
ATCATGCAACTCG**TAGGACAGGTGCCGGCAGCGCTCTGGGT**CATTTTCGGCGAGGACCGC  
TTTCGCTGGAGCGCGACGATGATCGGCCTGT**CGCTT**CGGG**TATTCGGAATCTTGCACGCC**  
CTCGCTCAAGCCTT**CGTCACTGGTCCC**GCCACCAACGTTTCGGCGAGAAGCAGGCCAT**T**  
ATCGCCGGCATGGCGGCCGACGCGCTGGG**CTAC**GTCTTGCTGGCGTTCGCGACGCGAGGC  
TGGATGGCCTTCCCCAT**TATGATTCTTCTCGCTTCCGGCGGCATCGGGATGCCCGCGTTG**  
CAGGCCATGCTGTCCAGG**CAGGTAGATGACGACCATCAGGGACAGCTTCAAGGATCGCTC**  
GCGGCTCT**TACCAGCC**TAACTTCGATCACTGGACCGCTGATCGT**CACGCGGATTTAT**GCC  
GCCTCGGCGAGCACATGGAACGGGTTGGCATGGATTG**TAGGCGCCGCC**TATACCTTGT**C**  
TGCTCCCGCGTTCGCTCGCGGTGCATGGAGCCGGGCCACCTCGACCTGAATGGAAGCC  
GGCGGCACCTCG**CTAA**

GCGGAGATTT**TATA**AGCGAGCTGTGACT**TATCGAGTATA**TCTCGAGC**WGAGGATCGTAAC**  
TTCTTCAATTCAGCTCG**TACCTT**CCTGCGAGCGT**CTAAGAAGTATTCAACCAATCTGGTA**  
GTGTCTCATGCGAGTTTT**CAGTATAC**GAACTCGTTGTTTTGCGCACAGT**CTAGAACCACC**  
AGACATTCTT**GACTTAG**CACTTTCAATCGGATGGCGGCCCGCTG**TAAATCAACCGACGA**  
CAGCTTGATTGATGG**TATCGGAGA**ACCGTTG**TAAATAT**CATCGG**TAAAACCATTACATTC**  
CGAG**TAA**ATCTTCAACGT**CGTCAACTGGCTTAC**CGGTTG**TACTTGT**CGGCTTGAAG**TACTT**  
TG**TAA**TCGGCTGAACCCCGATGCATTTTCGCTTCTCGACTTTT**GTAGATCTTCGAA**TAT  
TGACTT**TAGTTTTT**CGCGCTCTTT**TATGTTTTGGATCGT**GCTCGCAACCAACGTGATCCTC  
CCAT**TACA**ATTTCAAAGTTTTCGT**CGGTG**TAGTCACTGTGTGCATCGT**CGTCGATGAC**  
CG**TACTGTAG**CAGAGAT**TATA**AGCCATCATCAACGT**CGGATATA**TCCGACGTTGATGATG  
GT**TATA**ATCTCTGC**TACAGTAC**GGT**CATCGACGACGATGCACACAGTGACTACACC**GACG  
AAAATTTGAAATTG**TAGAAT**GGGAGGATCACGTTGGTTGCGAGCACGATCCAAACA**TAA**  
AAGAGCGCGAAAAAC**TAAAGTCAA**TATTCGAAGAT**CTAG**CAAAAGT**CGAGAAGCGAAAAT**  
GCATCGGGGTT**CAGCCGATTACAAAGTACTT**CAAGCCGACAAG**TACAACGCGTAAGCAGT**  
TGACGACGTTGAAGAT**TACTCGGAATGTAATGTTTTACCGATGATAATTACAACGGTTCT**

CCGATACCATCAATCAAGCTGTCGTCGGTTGATTTACAGCGGGCCGCCATCCGATTGAAA  
GTGCTAAAGTCAAGAATGTCTGGTGGTTCTAGACTGTGCGCAAACAACGAGTTCGTATA  
CTGAAAACCTCGCAGAGGACTACTACCAGATTTGGTTGAAACTTCTTAGACGCTCGCAGG  
AAGGTACGAGCTGAAATGAAGAACGTAGCGATCCTCTAGCTCGAGATATACTCGATAAG  
T

**Tet-193 (59.1% GC)**

ATGAAATCTAACAAATGCGCTCATCGTCATCCTCGGCACCGTCACCCTGGATGCTGTAGGC  
ATAGGCTTGGTTATGCCGGTACTGCCGGGCCTCTTGCGGGATATCGTCCATTCCGACAGC  
ATCGCCAGTCACTATGGCGTGCTGTAGCGCTATATGCGTTGATGCAATTTCTATGCGCA  
CCCGTTCTCGGAGCACTGTCCGACCGCTTTGGCCGCCGCCAGTCTTGCTCGCTTCGC  
CTTGGAGCCACTATCGACTACGCGATCATGGCGACCACACCCGTCCTGTGGATCCTCTAC  
GCCGGACGCATCGTGGCCGGCATCACCGGCGCCACAGGTGCGGTTGCTGGCGCCATATC  
GCCGACATCACCGATGGGGAAGATCGGGCTCGCCACTTCGGGCTCATGAGCGCTTGTTC  
GGCGTGGGTATGGTGGCAGGCCCGTGGCCGGGGACTGTTGGGCGCCATCTCCTTGCAT  
GCACCATTCTTTCGCGCGGCGGTGCTCAACGGCCTCAACCCTACTACTGGGCTGCTTCC  
ATGCAGGAGTCGCAAAAGGAGAGCGTCGACCGATGCCCTTGAGAGCCTTCAACCCAGTC  
AGCTCCTTCCGGTGGGCGCGGGGCATGACTATCGTCGCCGCACTATGACTGTCTTCTTT  
ATCATGCAACTCGTAGGACAGGTGCCGGCAGCGCTCTGGGTCAATTTTCGGCGAGGACCGC  
TTTCGCTGGAGCGCGACGATGATCGGCCTGTGCTTTCGGTATTCGGAATCTTGCACGCC  
CTCGCTCAAGCCTTCGTCACTGGTCCCGCCACCAACGTTTCGGCGAGAAGCAGGCCAT  
ATCGCCGGCATGGCGGCCGACGCGCTGGGCACGTCTTGCTGGCGTTCGCGACGCGAGGC  
TGGATGGCCTTCCCCATATGATTCTTCTCGCTTCCGGCGGCATCGGGATGCCCGCGTTG  
CAGGCCATGCTGTCCAGGCAGGTAGATGACGACCATCAGGGACAGCTTCAAGGATCGCTC  
GCGGCTCTTACCAGCCTAACTTCGATCACTGGACCGCTGATCGTCACGGCGATTATGCC  
GCCTCGGCGAGCACATGGAACGGGTTGGCATGGATTGTAGGCGCCGCCCTATACCTTGT  
TGCTCCCCCGCTTTCGTCGCGGTGCATGGAGCCGGGCCACCTCGACCTGAATGGAAGCC  
GGCGGCACCTCGCTAA

ACATCGAACACGCCAAGGCGATCGCCGATGAACAAGCGGCTCGTGCCCTTGACGTTGCG  
ATGTACAGTAACTGGTTCGAAACAAACGCACCGACTCGAGCCACCATGGACATCGAAGCG  
ATACGCGGACGTTACACCGTCTCCGTACCGGAGAGCATGGAACGTCCGATGGTGATTCTG  
TTCAACGACTTGACAATCTCCGAGGATTTGGTGGTGTTCGCGACGCACGGTGAGTTGATC  
AAGTACGACACTCGATAACCGCCGTCGTCGGACGCAGCGCTGGCCGCCATGAGCAGTCGT  
CGCGCCAGGAAGGGTGGCGAACGAGACAAACGCATCTCGTTGTACATGGTGCAGCGCGT  
ATCTACTCGCCGGGCATGAACACGACAAGCGCACGTACACCAGACTCCCGCGTGGGC  
TACGTGATCACGGTGATCAGTAATAACGCGCCACCGTCGACGTGCCTCGAAGTCTAGTC  
ACCGCACTCGGCATGGCGGGTGACGACGATCAGGTGGTGGTGGAGCGATGTCGGCGGCGGT  
GTTACATACACCGCGTTCGTTCCGTTAAACGACATCACGTTTCGTCACAGTACCTGCAACA  
TTACACGTTGCTCAAGTGTACCGACAAGGCGACGTGTATATTCGTCGACGAAACGCATCT  
GATGAAGTACGCGCGCCCTTGGCGTCGATACACAATCGCCAGTCCCGGATTCATATACGA  
GTACAAATAATTTACGGTGAAGTTTAGCGCGACCGTGGAGAGCACGCGCAGGGACGTGGC  
TCGAGTGTGCCCCATTGCGGTATCCGTATCTACGATGCGCCCAACACGCAGATCATGTA  
CGGCATGGCGAACGACATAACCGCACACATGATCGAGTACAAGAGTAGGGAGCGTTTCGAT  
CCCGTCTCTGTACGCCGAGAATCTACACAACGATCAGCTGTTGCGGATCAACGTGCGCAT  
AATGCGTGACTCGAAACCGTTAAACGCGAACCCGGCTACCTGGCTCGGCAACACCGACAG  
GTCCGTAGAAAACCTGCAAGCGCAAAGACCGGCACCAACGCAGACGTACGCTCCCTGATC  
GGTGTCAACAACACGCCAGACAATGTGCACGCCTACCTACAGCCGT

**Tet-240 (54.5% GC)**

ATGAAATCTAACAAATGCGCTCATCGTCATCCTCGGCACCGTCACCCTGGATGCTGTAGGC  
ATAGGCTTGGTTATGCCGGTACTGCCGGGCCTCTTGCGGGATATCGTCCATTCCGACAGC  
ATCGCCAGTCACTATGGCGTGCTGTAGCGCTATATGCGTTGATGCAATTTCTATGCGCA  
CCCGTTCTCGGAGCACTGTCCGACCGCTTTGGCCGCCGCCAGTCTTGCTCGCTTCGC  
CTTGGAGCCACTATCGACTACGCGATCATGGCGACCACACCCGTCCTGTGGATCCTCTAC

GCCGGACGCATCGTGGCCGGCATCACCGGCGCCACAGGTGCGGTTGCTGGCGCC**TATA**TC  
GCCGACATCACCGATGGGGAAGATCGGGCTCGCCACTTCGGGCTCATGAGCGCTTGTTC  
GGCGTGGG**TAT**GGTGGCAGGCCCGTGGCCGGGGACTGTTGGGCGCCATCTCCTTGCAT  
GCACCATTCTTGCGGCGGGTGCTCAACGGCCTCAACC**TACTACT**GGGCTGCTTCC**TA**  
ATGCAGGAGTCGCA**TA**AGGGAGAGCGTCGACCGATGCCCTTGAGAGCCTTCAACCCAGTC  
AGCTCCTTCCGGTGGGCGCGGGGCATGAC**TAT**CGTCGCCGCACT**TAT**GACTGTCTTCTTT  
**AT**CATGCAACTCG**TAG**GACAGGTGCCGGCAGCGCTCTGGGTCATTTTCGGCGAGGACCGC  
TTTCGCTGGAGCGCGACGATGATCGGCCTGTGCTTGC**GGTAT**TCGGAATCTTGCACGCC  
CTCGCTCAAGCCTTCGTCACTGGTCCCGCCACCAACGTTTCGGCGAGAAGCAGGCCAT**T**  
**AT**CGCCGGCATGGCGGCCGACGCGCTGGGC**TAC**GTCTTGCTGGCGTTCGCGACGCGAGGC  
TGGATGGCCTTCCCCAT**TAT**GATTCTTCTCGCTTCCGGCGGCATCGGGATGCCCGCGTTG  
CAGGCCATGCTGTCCAGGCAGG**TAG**ATGACGACCATCAGGGACAGCTTCAAGGATCGCTC  
GCGGCTCT**TACC**AGCC**TA**ACTTCGATCACTGGACCCTGATCGTCACGGCGATT**TAT**GCC  
GCCTCGGCGAGCACATGGAACGGGTTGGCATGGATTG**TAG**GCGCCGCC**TATA**CCTTGT  
TGCTCCCCCGCTTGCCTGCGGGTGCATGGAGCCGGGCCACCTCGACCTGAATGGAAGCC  
GGCGGCACCTCGC**TAA**

TCGCCGTTGCTGTGCGC**TACT**GTGCGGCCTTGTGATGCTGTTGTTTCTCGATCGAGTG  
GTTGGTGAAGTGC**TAT**CGGCAATTTTCGTGAACTTTTCAAATCTTCCACACCCTCCGT  
CAACGTTCTCCACG**TACC**CGGTTGGCCGTTGAATCGTCGGAACAGAGCCAGGGCGGCGAA  
CAATGCCGCGATCGC**TAT**GATCGTG**TACT**TGTTGCTGAACACCGATTCCGGCGTCGTTTCA  
AGCCCTCTTCCAAGCCAACCAAGCACCCATCAATGC**TAC**GGACACGA**TA**AGCACATGCTT  
AATTTCCATT**TACC**CAGTCGAAACAGCGAAGGACGG**TAC**CGGA**TAC**AAAGAAA**TAA**AAG  
ACACATTTT**TAG**AT**TA**ACCATT**TAT**TGACACACAGTGT**TACC**CAAAAGATCGCA**TA**ACC  
GTCGACGTCACCATCACGTTTGGGACAG**TACT**G**TAG**GAATCGCACATCGACCGC**TATA**CT  
GTT**CGTAC**AG**TAC**AGGAAGGCAAACG**TAA**AGTCCACAAACGACCTCGGAGAGTTGACTGC  
AAAAA**TA**ACACCATCTGGTTCCG**TAA**ATGCCAGAGAGATTCACTCGCCGCTCCGGT**TAT**  
GTCGCGCAATTGCACCAGGTTGGATCGTGAAAT**TGTA**AG**TAT**GTTTTGTTGAAACGTTT  
CAT**TAT**CACCGTCG**TATA**GT**TACC**CAGGTGCACCTCGGATCTTTGCACTGACCACTCGACG  
AATCACACCGGTGCGTGATCTTCGCAACAGACAA**TAT**TCATCACCCG**TACT**GGGATC**TAT**  
GAAGACGTCGA**TA**TGTGCGAG**TAA**AGT**TAT**GCGTGTCG**TAT**GCACAACCCAGCGAAGG  
TCTGGAGA**TA**ATCGAACGCATCATCTTCTCACCACCACAATGACCGATGAACGA**TA**  
**ATAC**CAATCGTCG**TACT**GCATCTCGCGAT**TA**ACTGTCTCGCCGTT**TAATA**CATTTTCA  
TT**TATAT**GTTTT**TAT**GCTG**TA**ACAC**TA**ATGTG**TAT**GT**TAC**ACGCGAACAGAAACGTGACT  
TCTTGA**ACTGCG**ACCGGTGCGT**CGAG**CGAGCGATCAATCG**TA**ACGTTGACTG**TATT**G**TAT**  
**TATT**GTGAAAC**TAC**ACTGTCTCGAATGTTTTG**TAT**CTGTCCACCGTCGACGA

**Tet-289 (53.3% GC)**

ATGAAATC**TA**ACAATGCGCTCATCGTCATCCTCGGCACCGTCACCCTGGATGCTG**TAG**GC  
**ATAG**GCTTGGT**TAT**GCCGG**TACT**GCCGGGCTCTTGCGGGA**TAT**CGTCCATTCCGACAGC  
ATCGCCAGTCAC**TAT**GGCGTGCTGC**TAG**CGC**TATA**TGCGTTGATGCAATTT**TAT**GCGCA  
CCCGTTCTCGGAGCACTGTCCGACCGCTTTGGCCGCCGCCAGTCCTGCTCGCTT**CGTAC**  
CTTGGAGCCAC**TAT**CGAC**TAC**CGGATCATGGCGACCACACCCGTCCTGTGGATCCTC**TAC**  
GCCGGACGCATCGTGGCCGGCATCACCGGCGCCACAGGTGCGGTTGCTGGCGCC**TATA**TC  
GCCGACATCACCGATGGGGAAGATCGGGCTCGCCACTTCGGGCTCATGAGCGCTTGTTC  
GGCGTGGG**TAT**GGTGGCAGGCCCGTGGCCGGGGACTGTTGGGCGCCATCTCCTTGCAT  
GCACCATTCTTGCGGCGGGTGCTCAACGGCCTCAACC**TACTACT**GGGCTGCTTCC**TA**  
ATGCAGGAGTCGCA**TA**AGGGAGAGCGTCGACCGATGCCCTTGAGAGCCTTCAACCCAGTC  
AGCTCCTTCCGGTGGGCGCGGGGCATGAC**TAT**CGTCGCCGCACT**TAT**GACTGTCTTCTTT  
**AT**CATGCAACTCG**TAG**GACAGGTGCCGGCAGCGCTCTGGGTCATTTTCGGCGAGGACCGC  
TTTCGCTGGAGCGCGACGATGATCGGCCTGTGCTTGC**GGTAT**TCGGAATCTTGCACGCC  
CTCGCTCAAGCCTTCGTCACTGGTCCCGCCACCAACGTTTCGGCGAGAAGCAGGCCAT**T**  
**AT**CGCCGGCATGGCGGCCGACGCGCTGGGC**TAC**GTCTTGCTGGCGTTCGCGACGCGAGGC  
TGGATGGCCTTCCCCAT**TAT**GATTCTTCTCGCTTCCGGCGGCATCGGGATGCCCGCGTTG  
CAGGCCATGCTGTCCAGGCAGG**TAG**ATGACGACCATCAGGGACAGCTTCAAGGATCGCTC



GCGAAGTGGTATCAACGACTAAATCGATGGCGGTGGAAATTAACAATTCAC TAATT TAA  
CAACATTTATTCATAAACTTAGGAATGTAATAACAAAACAAGACATCTTAGACCTAGAGA  
CGGGCGTTATAAATTTCA TACTAGACTTGTCCGTACACCTGGCGGT TACCGTTCATAAAC  
GTTGGCCGATGTTAGTGTACGCGGCGGCCGCATGTACCGCCCTTG TAGCTACCATAATCA  
TCATCTTGACTATA TCGATATGCGTGCTGTCGTGTCGACTACGAAGATTCGACGATGCCA  
TCAAGGACACGGTTGAATGATGCGAGTACGTCTTCGCGTGGCAAGTTTCCGTTCAACACG  
AAAAC TGAAC TATGGTTGTCGACGTATCGTTTTCGTG TAGCATTTCGACTCTTTCGAAA TAC  
TCGACGTCCAATGATTTCTCCGCTCGCGTCCTCGTTCTGAGCTCGGCGGTGACAGGTG  
TCCGGTTTCGTGTCAATGTACACGACGTGGTCGATTCTCGGAATGTCATTCTCCAAACTG  
CGAAACACATCCGTGTACACGTCGAATTGTTTGTCCGGTGATCGAGCCTCGGTCTCGCATC  
ATTCTGGTGAAGACGTCTGTACGCCGACCACGGCGAGCGTTCCATGATAACGACTCGAGCT  
CCGGTTCGCAGACATGTCTGTACGAGTCCAACCACTTTTGATAATTACTCGTCAGCACT  
TGCAGCTCGAAGGGGAAAGCGTATC
